# The dimensionality of plant–plant competition

Daniel B. Stouffer<sup>1,\*</sup>, Oscar Godoy<sup>2</sup>, Giulio V. Dalla Riva<sup>3</sup>, and Margaret M. Mayfield<sup>4</sup>

<sup>1</sup>Centre for Integrative Ecology, School of Biological Sciences, University of Canterbury, Christchurch 8140, New Zealand

<sup>2</sup>Departamento de Biología, Instituto Universitario de Investigación Marina (INMAR), Universidad de Cádiz, Puerto Real, 11510, Spain

<sup>3</sup>Department of Mathematics & Statistics, University of Canterbury, Christchurch 8140, New Zealand

<sup>4</sup>School of Biological Sciences, University of Queensland, Brisbane, QLD 4072, Australia

\*To whom correspondence should be addressed: [daniel.stouffer@canterbury.ac.nz](mailto:daniel.stouffer@canterbury.ac.nz)

## 1 **Abstract**

2 To avoid extinction, every species must be able to exploit available resources at  
3 least as well as the other species in its community. All else being equal, theory pre-  
4 dicts that the more distinct the niches of such co-occurring and competing species,  
5 the more species that can persist in the long run. However, both theoretical and  
6 experimental studies define a priori the nature and number of resources over which  
7 species compete. It therefore remains unclear whether or not species in empiri-  
8 cally realistic contexts are actually exploiting all or some of the niches available  
9 to them. Here we provide a mathematical solution to this long-standing problem.  
10 Specifically, we show how to use the interactions between sets of co-occurring plant  
11 species to quantify their implied “niche dimensionality”: the effective number of  
12 resources over which those species appear to be competing. We then apply this  
13 approach to quantify the niche dimensionality of 12 plant assemblages distributed  
14 across the globe. Contrary to conventional wisdom, we found that the niche dimen-  
15 sionality in these systems was much lower than the number of competing species.  
16 However, two high-resolution experiments also show that changes in the local envi-  
17 ronment induce a reshuffling of plant’s competitive roles and hence act to increase  
18 the assemblages’ effective niche dimensionality. Our results therefore indicate that  
19 homogeneous environments are unlikely to be able to maintain high diversity and  
20 also shows how environmental variation impacts species’ niches and hence their  
21 opportunities for long-term survival.

## 22 **Main**

23 Much of our current understanding of species coexistence derives from studying exploitation  
24 competition—competition between similar species for a shared pool of finite, limiting resources  
25 such as water, nutrients, light, or space<sup>1–6</sup>. In relatively constant environments, the coexistence  
26 of many species is thought to depend on two conditions above all others: there should be at least  
27 as many resources available as coexisting species<sup>7–9</sup> and those species should have different  
28 niches (e.g., resource-use requirements)<sup>10–13</sup>. When species have distinct niches, intraspecific  
29 competition should exceed interspecific competition, preventing communities from becoming  
30 overrun by the most dominant competitor or competitors<sup>14,15</sup>. When species are functionally  
31 similar, in contrast, their coexistence requires an additional, external source of variability to

1 buffer against otherwise unfavorable years, habitats, or environmental conditions<sup>16,17</sup>.

2 The theoretical basis linking niche differentiation to coexistence is quite clear<sup>18–21</sup>. The  
3 importance of niche differences for maintaining species diversity also has strong empirical sup-  
4 port<sup>22–24</sup>. However, we lack a clear picture of the effective number of niche dimensions that  
5 actually stabilize population dynamics in diverse natural communities. This is partly due to the  
6 fact that researchers traditionally select *a priori* the relevant resources or limiting factors over  
7 which species are thought to compete<sup>8,25</sup>. Unfortunately, such approaches cannot guarantee  
8 that all relevant dimensions have been taken into account, or that those selected are even the  
9 most relevant ones in practice; even controlled scenarios can therefore overlook previously-  
10 unknown, but equally important, mechanisms. Alternatively, researchers have taken a more in-  
11 direct approach of relating the strength of competition and resource-use variation to differences  
12 in functional traits<sup>13</sup> or evolutionary histories<sup>26</sup>, based on the assumption that these species  
13 characteristics are reasonable summaries of the multiple dimensions that compose a species’  
14 niche. Yet indirect, correlative approaches also cannot conclusively identify which resources  
15 are limiting<sup>8</sup> or, more importantly, how many niche dimensions are realized<sup>27</sup>. It therefore re-  
16 mains unclear whether or not the interactions measured for any given ecological assemblage are  
17 indicative of highly distinct or highly similar species competing over a large or a small resource  
18 pool.

19 Exhaustive inference of niche dimensionality in diverse empirical communities, as achieved  
20 by manipulation of all potential niche axes (e.g., light, water, space, and nutrients) is next to im-  
21 possible. With this in mind, we introduce here an alternative perspective on this long-standing  
22 challenge. Rather than characterize and compare resource use explicitly or select proxies from  
23 species’ characteristics, we develop a mathematical and statistical approach that uses informa-  
24 tion of the strengths and signs of interactions between species to infer their implied niche basis  
25 (Methods). In particular, our method provides a means to quantify the “niche dimensionality”

1 of any interacting species assemblage, which is a proxy for the effective number of resources  
2 or limiting factors over which those species are competing. From this perspective, niche di-  
3 mensionality is also a well-defined *mathematical* property of the emergent interactions between  
4 species.

5 In addition to estimating niche dimensionality, our approach decomposes pairwise interac-  
6 tions between species into (i) species' response traits, (ii) species' effect traits, and (iii) the  
7 relative strength of these responses and effects across the underlying niche dimensions (Fig. 1;  
8 Methods). This decomposition helps us identify species' competitive strategies across shared  
9 niche dimensions. Specifically, effect traits modulate the impact *of* each species on all others  
10 while response traits modulate the impact of all other species *on* each species<sup>15,28</sup>. When com-  
11 bined, the effect traits of one species and the response traits of another determine whether their  
12 directed, pairwise interactions will be strong or weak, competitive or facilitative<sup>26,29</sup>. Given that  
13 the net strength of an interaction between two species should be proportional to their niche over-  
14 lap<sup>7,30</sup>, our framework quantifies species' niche differences in terms of the extent to which they  
15 have an ability to *withstand* neighbor effects (their response) as well as an ability to *generate*  
16 neighbor effects (their effect). Each set of response and effect traits thus relates to a comparable  
17 set of "effective resources" such that a species with a large effect trait can be thought of as one  
18 that depletes the corresponding resource to the detriment of others, and a species with a large  
19 response trait can be thought of as one that is particularly sensitive to scarcity of that same  
20 resource. As such, response and effect traits allow us to capture the multi-dimensional "strate-  
21 gies" employed by species to outcompete each other or to avoid being outcompeted<sup>27,28</sup> based  
22 directly on the observed outcomes of species-species interactions (as opposed to indirectly; e.g.,  
23 via their phenotypic traits<sup>31</sup>).

24 To investigate whether there are common patterns of niche dimensionality across ecological  
25 communities, we applied our approach to 12 empirical assemblages drawn from plant commu-

1 nities across the globe (Methods). These assemblages cover a broad array of habitat types and  
2 plant life-history strategies, from deserts to forests and annual plants to trees (Supplementary  
3 Information). Each of these includes data regarding the strength and sign of species interactions  
4 between three to ten different plant species, and allows us to determine whether each species  
5 performs better or worse in the presence of all others. Moreover, the data come from field or  
6 common garden settings—in which we might expect extrinsic factors could give rise to greater  
7 realized variation—and greenhouses—in which we might expect variation to be driven almost  
8 entirely by intrinsic species properties.

## 9 **Results**

10 Given these 12 assemblages, we first determined their niche dimensionality  $\hat{d}$ : the minimum  
11 number of niche dimensions required to explain the observed variation within the data (Meth-  
12 ods). As noted above, niche dimensionality  $\hat{d}$  gives an indication of the effective number of  
13 resources over which the species in these different plant assemblages are likely competing, and  
14 hence the number of species predicted to coexist in the absence of exogenous variation. For  
15 every dataset and regardless of the experimental context, we observed that three or fewer niche  
16 dimensions ( $\hat{d} \leq 3$ ) were sufficient to accurately capture the pairwise interactions between  
17 species (Fig. 2 & Figs. S1–S3). In fact, the first niche dimension alone explained on average  
18 86.7% of the variation in the plant–plant interactions, and this ranged from 59.6% to 99.3%  
19 across the 12 datasets. To verify that these small values of  $\hat{d}$  are an ecological feature of these  
20 species assemblages and not an artifact of our methodology, we also estimated the niche di-  
21 mensionality for simulated data with randomly-assigned interaction coefficients. As expected,  
22 randomization tends to create “unstructured” data with niche dimensionality closer to the num-  
23 ber of species and hence greater than observed in the natural and experimental assemblages

1 (Supplementary Information).

2 After estimating niche dimensionality of each dataset, we next examined species' inferred  
3 response and effect traits to get a clearer picture of the forces underpinning species interac-  
4 tions. As representative examples, the best-fit parameters for Dataset 1-Wet and Dataset 1-Dry  
5 indicate that the 10 constituent species play distinct ecological roles across their leading niche  
6 dimensions (Fig. 3). In both cases, species are sorted into “classic” competitive hierarchies  
7 within which most species with strong effects tended to have weak responses and those with  
8 weak effects tended to have strong responses. However, realized niche differentiation in Dataset  
9 1-Wet was driven by greater variation in species' effects than their responses whereas species  
10 had heterogeneous responses and heterogeneous effects in Dataset 1-Dry. We observed similar  
11 patterns across each of the empirical datasets (Fig. S4), indicating that the leading dimensions  
12 of niche differentiation are those that create variation in species' responses to and effects on  
13 other species in their community.

14 We consistently found that estimates of niche dimensionality  $\hat{d}$  were lower than the total  
15 number of species  $S$  in each empirical assemblage (Fig. 2), and this did not depend on whether  
16 or not data came from experiments in the field, garden, or greenhouse (Table S1). Though niche  
17 dimensionality increased with increasing species richness (Fig. 2), the rate of increase was much  
18 lower than one dimension per species as expected from theory<sup>7-11</sup>. When niche dimensionality  
19 is less than the number of species, the interactions of two or more species directly mirror  
20 each other; should any of these functionally-similar species have even the slightest competi-  
21 tive advantage, it will tend to dominate in the long run<sup>1,7</sup>. Our results therefore are indicative  
22 of communities that can sustain limited diversity, despite bountiful evidence to the contrary in  
23 nature. Since some other mechanism must therefore be at play, we next determined whether  
24 changing environmental conditions increases niche dimensionality and hence the prospect of  
25 coexistence. To do so, we explored two of our datasets in greater detail as they each comprise

1 the same underlying assemblages interacting in two distinct environments. One pair of datasets  
2 (Dataset 1, Wet & Dry) consists of ten species in control and simulated-drought conditions<sup>32</sup>,  
3 designed to mimic the impact of extreme climatic events of the sort expected with ongoing  
4 global change<sup>33</sup>; the other pair of datasets (Dataset 2, Sun & Shade) consists of eight species  
5 in control and artificially-shaded conditions, since light availability is known to structure local  
6 diversity in that system<sup>34</sup>.

7 Viewed independently, Dataset 1 was captured by two and three niche dimensions in the Wet  
8 and Dry environments while Dataset 2 was captured by one and two niche dimensions in the Sun  
9 and Shade environments (Table S1). Nevertheless, the question remains whether the species in  
10 each Dataset sorted themselves along the *same* leading axes of niche variation in the contrasting  
11 environments. To check this, we measured the correlation between species' response and effect  
12 traits inferred under the two environmental conditions. These correlations were weak and non-  
13 significant (Procrustes  $\rho = 0.52$ ,  $p = 0.37$  for Dataset 1; Procrustes  $\rho = 0.40$ ,  $p = 0.06$   
14 for Dataset 2), indicating that niche dimensions differ depending on environmental conditions.  
15 Environmental variation therefore leads to significant shifts in species' absolute and relative  
16 niches (Fig. 3), in contrast to niche theories based on environmental tolerance<sup>35</sup> or functional  
17 traits<sup>36</sup> which generally assume that niches are immutable species' attributes.

## 18 Discussion

19 Much research is dedicated to exploring how the abiotic environment impacts species' perfor-  
20 mance in an *interaction-free* context<sup>37,38</sup>. Indeed, most predictions about how communities  
21 will change in the face of external disturbance, such as climate variability, depend on this re-  
22 lationship<sup>33,35</sup>. Comparatively less is known about how environmental conditions impact the  
23 pairwise interactions in multi-species assemblages and therefore about species' ability to per-

1 sist under changing environmental conditions<sup>32,39,40</sup>. One possible reason is that it is difficult to  
2 relate changes across multivariate interactions between species to changes in univariate single-  
3 species outcomes<sup>21,41</sup>. Here, we show how to decompose pairwise interactions into species-  
4 specific response and effect traits, thereby simplifying such inquiries. Moreover, the effect of  
5 the environment on species' response and effect traits generates multiple ecologically-relevant  
6 ways for pairwise interactions to vary from one environment to another: all else being equal,  
7 any species whose response traits increase in value from one environment to another will face  
8 harsher competition; in contrast, any species whose effect traits increase in value from one en-  
9 vironment to another should become increasingly dominant. In addition to demonstrating that  
10 low-dimensional competition is pervasive in plant assemblages, our approach provides a new  
11 lens through which to interrogate coexistence in varying environments.

12 Despite the differences between the datasets we have studied—such as their biogeograph-  
13 ical provenance, evolutionary histories, or growth form—we provide unambiguous evidence  
14 that plant–plant interactions are organized over a small number of effective niche dimensions,  
15 contrary to common theoretical expectations. While this fact would also appear to imply limited  
16 prospects for coexistence, low niche dimensionality in terms of species' interactive responses  
17 and effects is in strong agreement with other assessments of global plant diversity being cap-  
18 tured by a small number of life histories<sup>27</sup> and limited phenotypic trait combinations<sup>36,42</sup>. It  
19 also agrees with numerous studies that found that models parameterized with empirical data  
20 rarely predict coexistence<sup>13,41,43</sup>. And yet the environment leaves such a strong imprint on in-  
21 teractions that its variability generates one to many additional niche dimensions and serves as a  
22 de facto “landscape” across which species can evolve novel strategies to avoid being outcom-  
23 peted<sup>23,27,44</sup>. While this can make it harder to identify consistent structure in empirical interac-  
24 tion matrices<sup>45,46</sup>, it also highlights a critical link between changing environmental conditions  
25 and species' realized niches<sup>44,47</sup>.



## 1 **Methods**

### 2 **Empirical data**

3 We analyze 12 empirical assemblages to test our core hypothesis regarding variation in the  
4 structure of pairwise interactions between co-occurring plants (Table S1). For Datasets 1-Wet,  
5 1-Dry, 2-Sun, and 2-Shade, we directly analyzed raw empirical data from experimental studies  
6 of competition between annual plants in order to estimate interaction strengths. For Datasets  
7 3–12, we analyzed previously-estimated pairwise interaction matrices that were available in the  
8 literature.

### 9 **Estimating interaction strengths with fixed niche dimensionality**

10 When constrained to a fixed dimensionality  $d$ , our mathematical approach separates every pair-  
11 wise interaction  $\alpha_{ij}$  into  $d$  separate components which we refer to as “niche dimensions”. For  
12 the simplest case of  $d = 1$ , the per capita strength of the effect of species  $j$  on species  $i$  is given  
13 by  $\alpha_{ij|d=1} = \sigma_1 \times r_{i,1} \times e_{j,1}$ ; that is, by the product of the average strength of interactions in  
14 the first dimension ( $\sigma_1$ ), the “response trait” of species  $i$  in the first dimension ( $r_{i,1}$ ), and the  
15 “effect trait” of species  $j$  in the first dimension ( $e_{j,1}$ ). As described in the main text, we refer  
16 to the  $r_{i,k}$  parameters as responses because they influence how the performance of the same  
17 focal species  $i$  “responds” to the presence of different neighbor plants; similarly, we refer to  
18 the  $e_{j,k}$  parameters as effects because they influence how the same neighbor plant “effects” the  
19 performances of different focal plants. The separation of responses from effects allows us to  
20 generate asymmetric interaction matrices—where the effect of species  $i$  on  $j$  differs from the  
21 effect of species  $j$  on  $i$ —which is more empirically realistic<sup>45</sup> than the symmetric counterpart  
22 commonly studied in theoretical contexts<sup>48,49</sup>. For any value of  $d > 1$ , the net strength of a pair-  
23 wise interaction between  $i$  and  $j$  is given by  $\alpha_{ij|d} = \sum_{k=1}^d \sigma_d r_{i,k} e_{j,k}$ , where the sum is across

1 the different niche dimensions and the average strength of these dimensions is ordered such that  
2  $\sigma_1 > \sigma_2 > \dots > \sigma_d$ . In this way, the net strength of each interaction is additively partitioned  
3 across niche dimensions.

#### 4 **Density-dependent plant performance**

5 Each of Datasets 1-Wet, 1-Dry, 2-Sun, and 2-Shade consists of estimates of individual plant  
6 performance and the abundance or density of co-occurring plants within interaction neighbor-  
7 hoods. To infer interaction strengths, we therefore first had to define a mathematical model for  
8 how performance varies as a function of neighbor composition and abundance. In line with  
9 current best practice<sup>50</sup>, we estimated the per capita effects of neighboring species on the perfor-  
10 mance of focal individuals of each of the datasets using a model of the form

$$F_i = \frac{\lambda_i}{1 + \sum_{j=1}^S \alpha_{ij} N_j}, \quad (1)$$

11 where  $F_i$  is the observed estimate of the performance of a focal individual from species  $i$ ,  $\lambda_i$   
12 captures intrinsic performance of these individuals in the absence of competition,  $\alpha_{ij}$  is the per  
13 capita impact of species  $j$  on species  $i$ ,  $N_j$  is the abundance of species  $j$  in the focal individ-  
14 ual's interaction neighborhood, and the sum is across all species in that neighborhood (which  
15 could potentially include conspecifics of species  $i$ ). For an assemblage of  $S$  species, our goal  
16 then was to estimate the  $S \times S$  pairwise interaction matrix  $A$ . Given data of focal-plant per-  
17 formance and those plants' interaction neighborhoods, inference of both intrinsic performance  
18 and the strength of pairwise interactions can usually be achieved with standard regression ap-  
19 proaches<sup>51</sup>. However, these are no longer feasible when constraining interactions to occur at  
20 a fixed niche dimensionality. We therefore inferred the parameters of our model by exploit-  
21 ing the similarity of this mathematical model of competition<sup>26</sup> to singular value decomposition

1 (SVD)<sup>52</sup>. To further facilitate parameter estimation, we constrained the inferred response and  
2 effect traits so that they always create orthogonal matrices. As a result, we inferred  $d \times (2S - d)$   
3 total parameters for the interactions at any given niche dimensionality  $d$ .

#### 4 **Inferring best-fit reduced-dimensionality model parameters**

5 When we only had an empirical interaction matrix  $A$  for a given assemblage, we found the  
6 maximum-likelihood reduced-dimensionality representation directly using singular value de-  
7 composition (SVD)<sup>52</sup>. Specifically, one can factorize  $A$  into three separate matrices such that  
8  $A = R\Sigma E^t$ . Here,  $R$  and  $E$  are  $S \times S$  orthogonal matrices (i.e., matrices whose columns and  
9 rows are all orthogonal unit vectors), and  $\Sigma$  is a matrix with the singular values of  $A$  along  
10 the diagonal and zeroes elsewhere. We can equivalently factorize the matrix as  $A = \tilde{R}\tilde{E}^T$  by  
11 defining  $\tilde{R} = R\Sigma^{1/2}$  and  $\tilde{E} = E\Sigma^{1/2}$  and where  $\Sigma^{1/2}$  is the Cholesky decomposition of  $\Sigma$ . SVD  
12 works in such a way that  $\hat{A}_d = \hat{R}_d\hat{E}_d^T$  is the best least-squares approximation of  $A$  at any re-  
13 source dimensionality  $d \leq S$  as long as  $\hat{R}_d$  is the  $S \times d$  sub-matrix given by the first  $d$  columns  
14 of  $\tilde{R}$  and  $\hat{E}_d$  is the  $S \times d$  sub-matrix given by the first  $d$  columns of  $\tilde{E}$ . As a consequence,  
15 the maximum likelihood values of the response and effect parameters in the first  $d$  resource  
16 dimensions correspond to the first  $d$  columns of  $R$  and  $E$ , respectively.

17 When we had raw empirical data and hence the values composing the interaction  $A$  were un-  
18 known, we inferred them from the raw empirical data. For any fixed resource dimensionality  $d$ ,  
19 this required estimating the  $d$  values along the diagonal of  $\Sigma_d$  and the two  $S \times d$  matrices  $R_d$   
20 and  $E_d$ . To maintain coherence with SVD, the columns of  $R_d$  were maintained to be orthogonal  
21 unit vectors. This implies that the first column has  $S - 1$  free parameters, the second column  
22 has  $S - 2$  free parameters, and so on, up to a maximum of  $S(S - 1)/2$  free parameters if  
23  $d = S$ . The same is true for the columns of  $E_d$ . In total, we must therefore perform inference  
24 on  $d \times (2S - d)$  parameters. In order to ensure that the parameters of  $R_d$  and  $E_d$  maintain the

1 orthogonality constraint and uniqueness during optimization, we followed the Cayley transfor-  
2 mation method of Shepard et al.<sup>53</sup> and Jauch et al.<sup>54</sup>.  
3 We used the *mle2* function from the *bbmle* package<sup>55</sup> in the statistical programming language  
4 R<sup>56</sup> to identify the optimal values of  $\Sigma_d$ ,  $R_d$ , and  $E_d$ . Conveniently, Eq. (1) can be fit as a  
5 Poisson regression with inverse link function<sup>57</sup>. To facilitate comparison to the approach with  
6 which the matrix  $A$  is not factorized into its response–effect equivalent, we therefore used *mle2*  
7 to minimize the exact same deviance function as used for Poisson regression rather than to  
8 maximize the data’s log-likelihood.

## 9 **Statistical analysis**

10 For Datasets 1-Wet, 1-Dry, 2-Sun, and 2-Shade, we inferred the best-fit parameters for inter-  
11 actions constrained to occur when dimensionality  $d = S$ . We then used the inferred values of  
12  $\{\hat{\sigma}_1, \hat{\sigma}_2, \dots, \hat{\sigma}_S\}$  and identified the niche dimensionality  $\hat{d}$  that was sufficient to capture 95%  
13 of the variation in the inferred interaction matrix. For Datasets 3–12—for which we only had  
14 an estimated interaction matrix  $A$ —we determined the niche dimensionality  $\hat{d}$  based directly  
15 on the singular values of  $A$ <sup>52</sup>. For all dataset types, values  $d < \hat{d}$  fail to capture biologically  
16 meaningful variation in the observed plant–plant interactions; values of  $d > \hat{d}$  require the use of  
17 an overly complex statistical model with an excess of resource dimensions. Though we expect  
18 that values  $d > \hat{d}$  will give a more refined description of species’ fundamental niches,  $\hat{d}$  is a  
19 better reflection of the niche differences that are *actually realized* as a result of species–species  
20 interactions.

21 We then studied the properties of the  $\hat{d}$ -dimensional estimates of species’ response and ef-  
22 fect traits within each dataset. For the paired Datasets 1 & 2, we tested whether the positions  
23 of species in each of these  $\hat{d}$ -dimensional spaces were correlated using a Procrustes analysis.  
24 A significant Procrustes statistic indicates that the effective response and effect “hierarchies”

1 between species in both environments are positively related (e.g., species always tend to be  
2 the strongest or weakest effectors or responders) whereas a non-significant result implies that  
3 species likely play different roles when the environmental conditions change.

#### 4 **Code availability**

5 The code used for analyses in this study can be found at [https://github.com/stoufferlab/  
6 dimensionality-of-competition](https://github.com/stoufferlab/dimensionality-of-competition).

#### 7 **Data availability**

8 All data used in this study can be obtained from [https://doi.org/10.5061/dryad.  
9 8v13t2q](https://doi.org/10.5061/dryad.8v13t2q), <https://doi.org/10.5061/dryad.5d1s9>, [https://doi.org/10.  
10 5061/dryad.1sm06sp](https://doi.org/10.5061/dryad.1sm06sp), or the original references as listed in Table S1.

## 1 **References**

- 2 1. Gause, G. F. *The Struggle for Existence* (Williams & Wilkins Co., Baltimore, MD, USA, 1934).
- 3 2. Birch, L. C. The meanings of competition. *Am. Nat.* **91**, 5–18 (1957).
- 4 3. Armstrong, R. A. & McGehee, R. Competitive exclusion. *Am. Nat.* **115**, 151–170 (1980).
- 5 4. Huisman, J. & Weissing, F. J. Biodiversity of plankton by species oscillations and chaos. *Nature*  
6 **402**, 407–410 (1999).
- 7 5. Reich, P. B. *et al.* Do species and functional groups differ in acquisition and use of C, N and water  
8 under varying atmospheric CO<sub>2</sub> and N availability regimes? A field test with 16 grassland species.  
9 *New Phytol.* **150**, 435–448 (2001).
- 10 6. Craine, J. M. & Dybzinski, R. Mechanisms of plant competition for nutrients, water and light. *Funct.*  
11 *Ecol.* **27**, 833–840 (2013).
- 12 7. MacArthur, R. & Levins, R. The limiting similarity, convergence, and divergence of coexisting  
13 species. *Am. Nat.* **101**, 377–385 (1967).
- 14 8. Tilman, D. *Resource Competition and Community Structure* (Princeton University Press, Princeton,  
15 NJ, USA, 1982).
- 16 9. Haerter, J. O., Mitarai, N. & Sneppen, K. Phage and bacteria support mutual diversity in a narrowing  
17 staircase of coexistence. *ISME J.* **8**, 2317–2326 (2014).
- 18 10. Chesson, P. MacArthur’s consumer-resource model. *Theor. Popul. Biol.* **37**, 26–38 (1990).
- 19 11. Abrams, P. A. & Rueffler, C. Coexistence and limiting similarity of consumer species competing for  
20 a linear array of resources. *Ecology* **90**, 812–822 (2009).
- 21 12. Blonder, B., Lamanna, C., Violle, C. & Enquist, B. J. The n-dimensional hypervolume. *Global Ecol.*  
22 *Biogeogr.* **23**, 595–609 (2014).
- 23 13. Kraft, N. J. B., Godoy, O. & Levine, J. M. Plant functional traits and the multidimensional nature of  
24 species coexistence. *Proc. Natl. Acad. Sci. USA* **112**, 797–802 (2015).

- 1 14. Adler, P. B. *et al.* Competition and coexistence in plant communities: intraspecific competition is  
2 stronger than interspecific competition. *Ecol. Lett.* **21**, 1319–1329 (2018).
- 3 15. Broekman, M. J. E. *et al.* Signs of stabilisation and stable coexistence. *Ecol. Lett.* **22**, 1957–1975  
4 (2019).
- 5 16. Chesson, P. L. Coexistence of Competitors in a Stochastic Environment: The Storage Effect. In *Pop-*  
6 *ulation Biology* (eds. Freedman, H. I. & Strobeck, C.), 188–198 (Springer-Verlag, Berlin, Germany,  
7 1983).
- 8 17. Chesson, P. L. The Storage Effect in Stochastic Population Models. In *Mathematical Ecology*,  
9 76–89 (Springer-Verlag, Berlin, Germany, 1984).
- 10 18. Tilman, D. Resource competition between plankton algae: An experimental and theoretical ap-  
11 proach. *Ecology* **58**, 338–348 (1977).
- 12 19. Chesson, P. Mechanisms of maintenance of species diversity. *Annu. Rev. Ecol. Syst.* **31**, 343–366  
13 (2000).
- 14 20. Allesina, S. & Levine, J. M. A competitive network theory of species diversity. *Proc. Natl. Acad.*  
15 *Sci. USA* **108**, 5638–5642 (2011).
- 16 21. Saavedra, S. *et al.* A structural approach for understanding multispecies coexistence. *Ecol. Monogr.*  
17 **87**, 470–486 (2017).
- 18 22. Goldberg, D. E. Competitive ability: Definitions, contingency and correlated traits. *Philos. Trans.*  
19 *R. Soc. Lond. B* **351**, 1377–1385 (1996).
- 20 23. Silvertown, J. Plant coexistence and the niche. *Trends Ecol. Evol.* **19**, 605–611 (2004).
- 21 24. Levine, J. M. & HilleRisLambers, J. The importance of niches for the maintenance of species  
22 diversity. *Nature* **461**, 254–257 (2009).
- 23 25. Grover, J. P. *Resource Competition* (Chapman & Hall, London, UK, 1997).

- 1 26. Godoy, O., Kraft, N. J. B. & Levine, J. M. Phylogenetic relatedness and the determinants of com-  
2 petitive outcomes. *Ecol. Lett.* **17**, 836–844 (2014).
- 3 27. Grime, J. P. & Pierce, S. *The Evolutionary Strategies that Shape Ecosystems* (John Wiley & Sons,  
4 Inc., Chichester, UK, 2012).
- 5 28. Goldberg, D. E. & Landa, K. Competitive effect and response: Hierarchies and correlated traits in  
6 the early stages of competition. *J. Ecol.* **79**, 1013–1030 (1991).
- 7 29. Goldberg, D. E. Components of resource competition in plant communities. In *Perspectives in*  
8 *Plant Competition* (eds. Grace, J. & Tilman, D.), 27–49 (Academic Press, Inc., San Diego, CA,  
9 USA, 1990).
- 10 30. Pianka, E. R. Niche overlap and diffuse competition. *Proc. Natl. Acad. Sci. USA* **71**, 2141–2145  
11 (1974).
- 12 31. Pavoine, S., Vela, E., Gachet, S., de Bélair, G. & Bonsall, M. B. Linking patterns in phylogeny,  
13 traits, abiotic variables and space: a novel approach to linking environmental filtering and plant  
14 community assembly. *J. Ecol.* **99**, 165–175 (2011).
- 15 32. Matías, L., Godoy, O., Gómez-Aparicio, L. & Pérez-Ramos, I. M. An experimental extreme drought  
16 reduces the likelihood of species to coexist despite increasing intransitivity in competitive networks.  
17 *J. Ecol.* **106**, 826–837 (2018).
- 18 33. Araújo, M. B. & Rahbek, C. How does climate change affect biodiversity? *Science* **313**, 1396  
19 (2006).
- 20 34. Dwyer, J. M., Hobbs, R. J., Wainwright, C. E. & Mayfield, M. M. Climate moderates release from  
21 nutrient limitation in natural annual plant communities. *Glob. Ecol. Biogeogr.* **24**, 549–561 (2015).
- 22 35. Colwell, R. K. & Rangel, T. F. Hutchinson’s duality: The once and future niche. *Proc. Natl. Acad.*  
23 *Sci. USA* **106**, 19651 (2009).
- 24 36. Díaz, S. *et al.* The global spectrum of plant form and function. *Nature* **529**, 167–171 (2016).



- 1 37. Keddy, P. A. Assembly and response rules: two goals for predictive community ecology. *J. Veg. Sci.*  
2 **3**, 157–164 (1992).
- 3 38. Laughlin, D. C., Joshi, C., van Bodegom, P. M., Bastow, Z. A. & Fulé, P. Z. A predictive model  
4 of community assembly that incorporates intraspecific trait variation. *Ecol. Lett.* **15**, 1291–1299  
5 (2012).
- 6 39. Bimler, M. D., Stouffer, D. B., Lai, H. R. & Mayfield, M. M. Accurate predictions of coexistence in  
7 natural systems require the inclusion of facilitative interactions and environmental dependency. *J.*  
8 *Ecol.* **106**, 1839–1852 (2018).
- 9 40. Song, C., Rohr, R. P. & Saavedra, S. A guideline to study the feasibility domain of multi-trophic  
10 and changing ecological communities. *J. Theor. Biol.* **450**, 30–36 (2018).
- 11 41. Petry, W. K., Kandlikar, G. S., Kraft, N. J. B., Godoy, O. & Levine, J. M. A competition-defence  
12 trade-off both promotes and weakens coexistence in an annual plant community. *J. Ecol.* **106**, 1806–  
13 1818 (2018).
- 14 42. Laughlin, D. C. The intrinsic dimensionality of plant traits and its relevance to community assembly.  
15 *J. Ecol.* **102**, 186–193 (2014).
- 16 43. Godoy, O., Stouffer, D. B., Kraft, N. J. B. & Levine, J. M. Intransitivity is infrequent and fails  
17 to promote annual plant coexistence without pairwise niche differences. *Ecology* **98**, 1193–1200  
18 (2017).
- 19 44. Holt, R. D. Bringing the Hutchinsonian niche into the 21st century: Ecological and evolutionary  
20 perspectives. *Proc. Natl. Acad. Sci. USA* **106**, 19659–19665 (2009).
- 21 45. Kinlock, N. L. A meta-analysis of plant interaction networks reveals competitive hierarchies as well  
22 as facilitation and intransitivity. *Am. Nat.* **194**, 640–653 (2019).
- 23 46. Barbier, M., de Mazancourt, C., Loreau, M. & Bunin, G. Fingerprints of high-dimensional coexis-  
24 tence in complex ecosystems. *Phys. Rev. X* **11**, 011009 (2021).

- 1 47. Hutchinson, G. E. Concluding remarks. In *Population Studies: Animal Ecology and Demography*,  
2 vol. 22 of *Cold Spring Harbor Symposia on Quantitative Biology*, 415–427 (1957).
- 3 48. Barabás, G., Michalska-Smith, M. J. & Allesina, S. The effect of intra- and interspecific competition  
4 on coexistence in multispecies communities. *Am. Nat.* **188**, E1–E12 (2016).
- 5 49. Barbier, M., Arnoldi, J.-F., Bunin, G. & Loreau, M. Generic assembly patterns in complex ecological  
6 communities. *Proc. Natl. Acad. Sci. USA* **115**, 2156–2161 (2018).
- 7 50. Hart, S. P., Freckleton, R. P. & Levine, J. M. How to quantify competitive ability. *J. Ecol.* **106**,  
8 1902–1909 (2018).
- 9 51. Mayfield, M. M. & Stouffer, D. B. Higher-order interactions capture unexplained complexity in  
10 diverse communities. *Nature Ecol. Evol.* **1**, 0062 (2017).
- 11 52. Dalla Riva, G. V. & Stouffer, D. B. Exploring the evolutionary signature of food webs’ backbones  
12 using functional traits. *Oikos* **125**, 446–456 (2016).
- 13 53. Shepard, R., Brozell, S. R. & Gidofalvi, G. The representation and parametrization of orthogonal  
14 matrices. *J. Phys. Chem. A* **119**, 7924–7939 (2015).
- 15 54. Jauch, M., Hoff, P. D. & Dunson, D. B. Random orthogonal matrices and the Cayley transform.  
16 *Bernoulli* **26**, 1560–1586 (2020).
- 17 55. Bolker, B. & R Development Core Team. *bbmle: Tools for General Maximum Likelihood Estima-*  
18 *tion* (2020). URL <https://CRAN.R-project.org/package=bbmle>, r package version  
19 1.0.23.1.
- 20 56. R Core Team. *R: A Language and Environment for Statistical Computing*. R Foundation for Statis-  
21 tical Computing, Vienna, Austria (2021). URL <http://www.R-project.org>.
- 22 57. Rao, C., Toutenberg, H., Shalabh & Heumann, C. *Linear Models and Generalizations* (Springer,  
23 Berlin, 2010).

1 **Acknowledgements** We thank Bernat Bramon Mora, Hao Ran Lai, and Anne McLeod for pro-  
2 viding comments and suggestions on the manuscript. We acknowledge the support of a Ruther-  
3 ford Discovery Fellowship (RDF-13-UOC-003 to DBS) and a Marsden Fund Grant (16-UOC-  
4 008 to DBS and MMM), both administered by the Royal Society New Zealand Te Apārangī  
5 from NZ Government funding, an ARC Discovery Grant (DP140100574 to MMM and DBS),  
6 and a Ramón y Cajal Fellowship provided by the Spanish Ministry of Economy and Competi-  
7 tiveness (MINECO) and by the European Social Fund (RYC-2017-23666 to OG).

## 1 Figures and figure captions

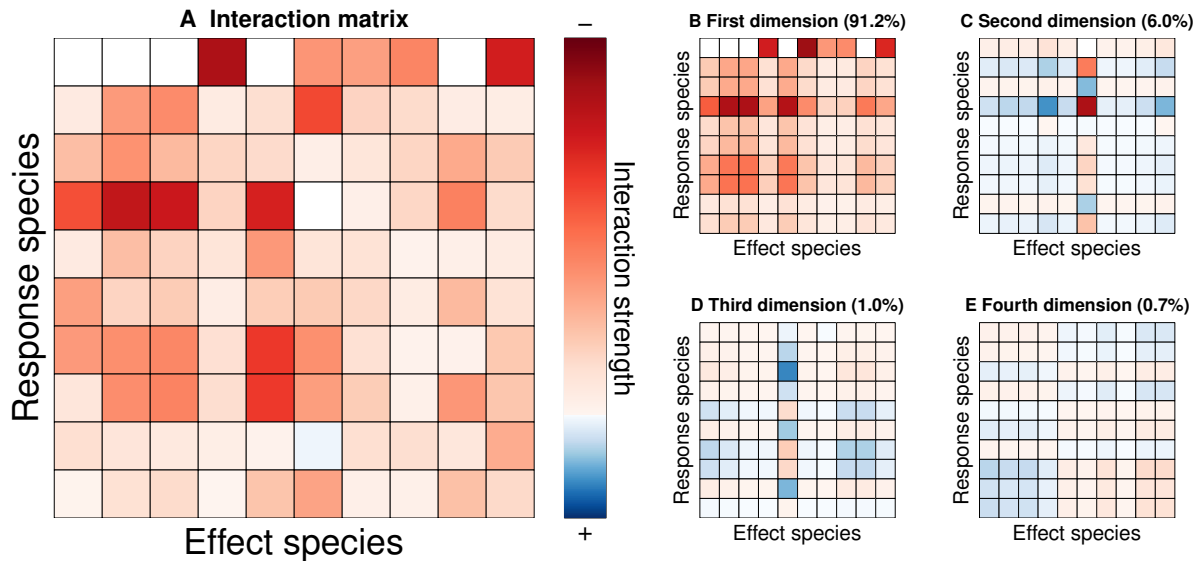

**Figure 1:** Response-effect decomposition of a pairwise interaction matrix. **A**, The inferred  $10 \times 10$  interaction matrix for Dataset 1-Wet, where rows indicate the species “responding” to the interaction and the columns represent the species “effecting” the interaction. Interactions are colored based on the strength and sign of the net pairwise impact: net competitive values are indicated from white to red while net facilitative values are indicated from white to blue. **B**, **C**, **D**, and **E**, The full pairwise interaction matrix can be parsimoniously decomposed into matrices that capture implicit niche differentiation underpinning interactions across the assemblage. For this dataset, the first, second, third, and fourth niche dimensions explain 91.2%, 6.0%, 1.0%, and 0.7% of the variation observed in the data, respectively. Note that interactions in the first niche dimension are overwhelmingly competitive whereas species-specific variation within the second through fourth dimensions both strengthen and weaken the net strength of pairwise interactions.

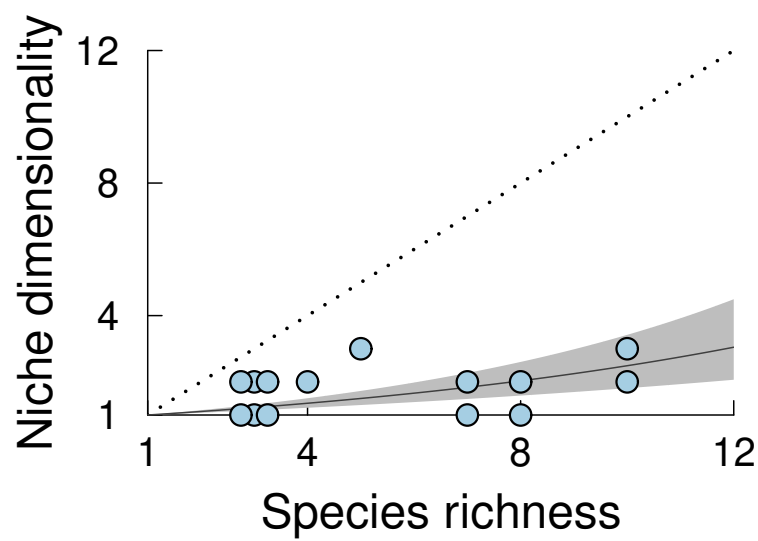

**Figure 2:** Inferred niche dimensionality ( $\hat{d}$ ) relative to the actual species richness of each empirical assemblage ( $S$ ). The dotted line represents the upper bound of niche dimensionality equal to the number of species whereas the solid line represents the predicted increase of niche dimensions ( $\pm$  standard error) based on the trend observed across the empirical datasets. Note that datasets with identical values of  $\hat{d}$  and  $S$  have been jittered slightly to make them visible.

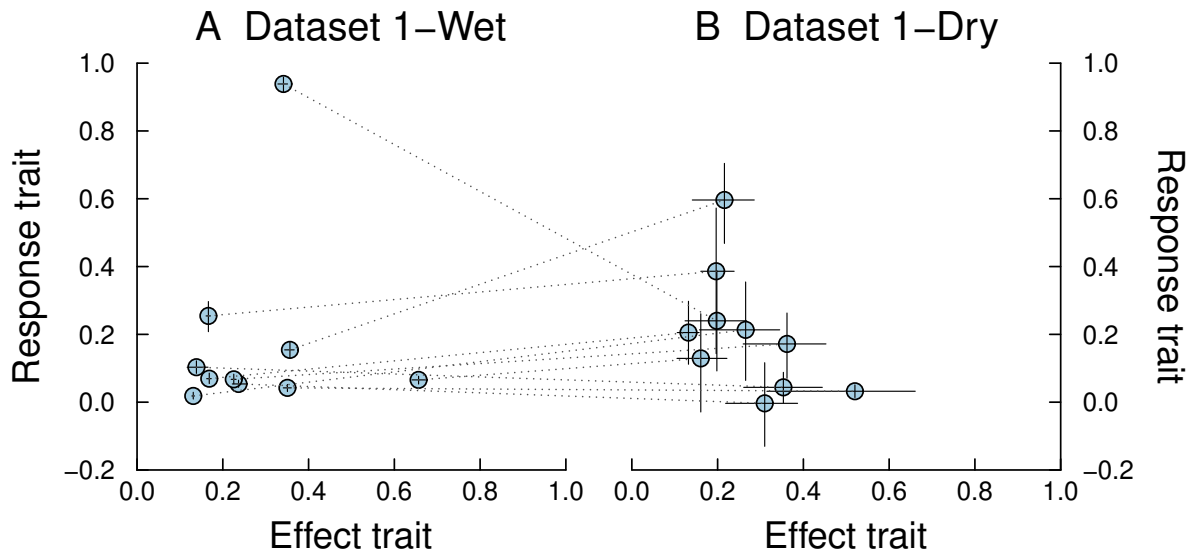

**Figure 3:** Species' response and effect traits in the first niche dimension for both Dataset 1-Wet and Dataset 1-Dry. **A**, In Dataset 1-Wet, species are organized along a competitive hierarchy driven largely by variation in their effects as neighbors: dominant competitors have large positive effect traits and small positive response traits whereas weaker competitors have small positive effect traits and large positive response traits. One notable species clusters outside this hierarchy by exhibiting a moderate effect trait and large positive response trait, indicating that it is particularly susceptible to competitive effects. **B**, In Dataset 2-Dry, species are again organized in a competitive hierarchy but exhibiting clearer variation in both response and effect traits. The dotted lines connect species' response and effect traits in Wet environmental conditions to those same species' response and effect traits in Dry environmental conditions. Variation between where species fall in the two panels is thus indicative of reorganization of the underlying competitive hierarchy. In both panels, the error bars at each point indicate the 25th to 75th percentile confidence interval about their inferred values and have been plotted on top of points to facilitate visibility when they are small.
